# Supplementary material
Source: publisher figshare collection journal article supplement (https://sage.figshare.com/ndownloader/files/13124801)

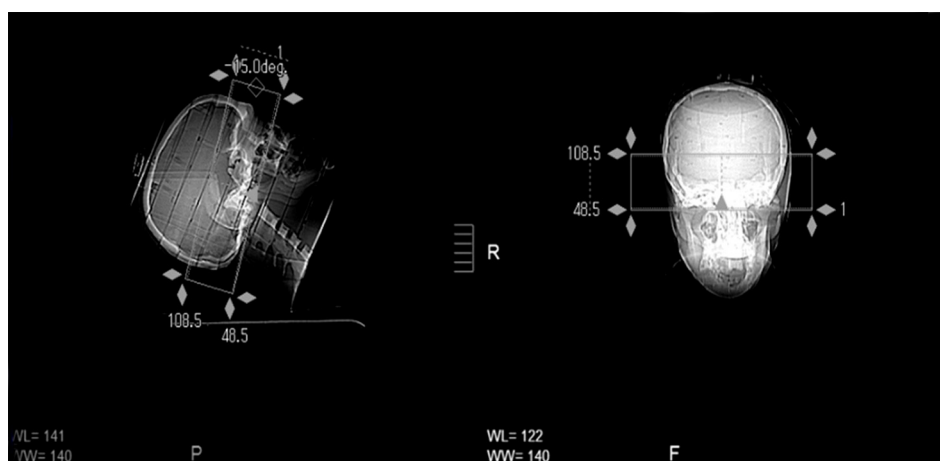

**Supplementary Figure 1**

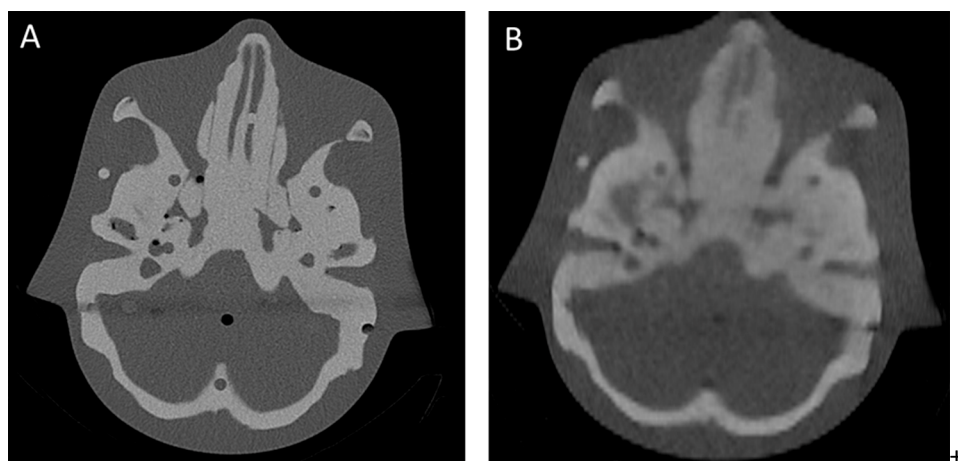

**Supplementary Figure 2**

Supplement: Supplementary file 1 [file 13124801]
